# Supplementary material
Source: PubMed Central journal article supplement (PMC1895543)
Supplement: blood_blood-2005-11-013458_1.pdf [file blood_blood-2005-11-013458_1.pdf]

| <b>Characteristics</b>               | <b>N / Total of Training (%)</b> | <b>N / Total of Test (%)</b> |
|--------------------------------------|----------------------------------|------------------------------|
| Age >= 65 yr                         | 50 (20%)                         | 41 (26%)                     |
| Female sex                           | 114 (45%)                        | 63 (40%)                     |
| White race                           | 231 (90%)                        | 139 (88%)                    |
| B2M >= 4 mg/liter                    | 98 (38%)                         | 63 (40%)                     |
| C-reactive protein >= 4 mg/liter     | 15 (6%)                          | 11 (7%)                      |
| Creatine >= 2 mg/dl (177 umol/liter) | 34 (14%)                         | 15 (10%)                     |
| LDH >= 190 IU/liter                  | 85 (33%)                         | 46 (29%)                     |
| Albumin <3.5 g/dl                    | 100 (39%)                        | 67 (42%)                     |
| HGB <10 g/dl                         | 69 (27%)                         | 56 (35%)                     |
| Cytogenetic Abnormalities            | 106 (41%)                        | 61 (39%)                     |
| Plasma cells (Aspirate) >=33%        | 133 (58%)                        | 77 (53%)                     |
| Plasma cells (Biopsy) >=33%          | 141 (60%)                        | 99 (65%)                     |
| MRI >= 3                             | 144 (58%)                        | 62 (53%)                     |
