# Supplementary material
Source: PubMed Central journal article supplement (PMC1895543)
Supplement: blood_blood-2005-11-013458_2.pdf [file blood_blood-2005-11-013458_2.pdf]

| <b>Affymetrix Probe Set</b> | <b>Gene Name / Probe Set</b> | <b>Chromosome Map Position</b> | <b>SAM Score</b> | <b>Subgroup</b> |
|-----------------------------|------------------------------|--------------------------------|------------------|-----------------|
| 206640_x_at                 | <i>GAGE2</i>                 | Xp11.23                        | 8.18             | PR              |
| 202503_s_at                 | <i>KIAA0101</i>              | 15q22.31                       | 7.84             | PR              |
| 202705_at                   | <i>CCNB2</i>                 | 15q22.2                        | 7.79             | PR              |
| 208235_x_at                 | <i>GAGE5</i>                 | Xp11.4-p11.2                   | 7.78             | PR              |
| 202589_at                   | <i>TYMS</i>                  | 18p11.32                       | 7.4              | PR              |
| 213008_at                   | <i>FLJ10719</i>              | 15q25-q26                      | 7.39             | PR              |
| 225834_at                   | <i>FAM72A</i>                | 1p11.2                         | 7.37             | PR              |
| 223381_at                   | <i>CDCA1</i>                 | 1q23.3                         | 7.22             | PR              |
| 226980_at                   | <i>DEPDC1B</i>               | 5q12.1                         | 7.20             | PR              |
| 208155_x_at                 | <i>GAGE4</i>                 | Xp11.4-p11.2                   | 7.19             | PR              |
| 201890_at                   | <i>RRM2</i>                  | 2p25-p24                       | 7.15             | PR              |
| 223229_at                   | <i>UBE2T</i>                 | 1q32.1                         | 7.09             | PR              |
| 207739_s_at                 | <i>GAGE1</i>                 | Xp11.4-p11.2                   | 7.08             | PR              |
| 211762_s_at                 | <i>KPNA2</i>                 | 17q23.1-q23.3                  | 7.06             | PR              |
| 214612_x_at                 | <i>MAGEA6</i>                | Xq28                           | 7.06             | PR              |
| 204023_at                   | <i>RFC4</i>                  | 3q27                           | 6.96             | PR              |
| 209942_x_at                 | <i>MAGEA3</i>                | Xq28                           | 6.94             | PR              |
| 218039_at                   | <i>NUSAP1</i>                | 15q15.1                        | 6.87             | PR              |
| 203755_at                   | <i>BUB1B</i>                 | 15q15                          | 6.85             | PR              |
| 202095_s_at                 | <i>BIRC5</i>                 | 17q25                          | 6.83             | PR              |
| 220651_s_at                 | <i>MCM10</i>                 | 10p13                          | 6.82             | PR              |
| 218156_s_at                 | <i>FLJ10534</i>              | 17p13.3                        | 6.81             | PR              |
| 236641_at                   | <i>KIF14</i>                 | 1pter-q31.3                    | 6.74             | PR              |
| 210052_s_at                 | <i>TPX2</i>                  | 20q11.2                        | 6.74             | PR              |
| 222077_s_at                 | <i>RACGAP1</i>               | 12q13.12                       | 6.72             | PR              |
| 219990_at                   | <i>E2F8</i>                  | 11p15.1                        | 6.67             | PR              |
| 222606_at                   | <i>222606_at</i>             | 15q22.31                       | 6.50             | PR              |
| 235572_at                   | <i>SPBC24</i>                | 19p13.2                        | 6.49             | PR              |
| 201292_at                   | <i>TOP2A</i>                 | 17q21-q22                      | 6.47             | PR              |
| 208079_s_at                 | <i>STK6</i>                  | 20q13.2-q13.3                  | 6.47             | PR              |
| 209891_at                   | <i>SPBC25</i>                | 2q24.3                         | 6.47             | PR              |
| 214710_s_at                 | <i>CCNB1</i>                 | 5q12                           | 6.42             | PR              |
| 228273_at                   | <i>FLJ11029</i>              | 17q23.2                        | 6.41             | PR              |
| 219918_s_at                 | <i>ASPM</i>                  | 1q31                           | 6.38             | PR              |
| 202580_x_at                 | <i>FOXM1</i>                 | 12p13                          | 6.38             | PR              |
| 226287_at                   | <i>NY-REN-41</i>             | 11p14.1                        | 6.35             | PR              |
| 211576_s_at                 | <i>SLC19A1</i>               | 21q22.3                        | 6.32             | PR              |
| 203213_at                   | <i>CDC2</i>                  | 10q21.1                        | 6.22             | PR              |
| 204033_at                   | <i>TRIP13</i>                | 5p15.33                        | 6.21             | PR              |
| 204822_at                   | <i>TTK</i>                   | 6q13-q21                       | 6.20             | PR              |
| 207325_x_at                 | <i>MAGEA1</i>                | Xq28                           | 6.19             | PR              |
| 202427_s_at                 | <i>BRP44</i>                 | 1q24                           | 6.18             | PR              |
| 203358_s_at                 | <i>EZH2</i>                  | 7q35-q36                       | 6.17             | PR              |
| 1554271_a_at                | <i>C1orf155</i>              | 1q25.1                         | 6.11             | PR              |
| 203764_at                   | <i>DLG7</i>                  | 14q22.3                        | 6.11             | PR              |
| 218009_s_at                 | <i>PRC1</i>                  | 15q26.1                        | 6.09             | PR              |
| 219000_s_at                 | <i>DCC1</i>                  | 8q24.12                        | 6.08             | PR              |
| 204641_at                   | <i>NEK2</i>                  | 1q32.2-q41                     | 6.06             | PR              |
| 202954_at                   | <i>UBE2C</i>                 | 20q13.12                       | 6.03             | PR              |
| 217640_x_at                 | <i>C18orf24</i>              | 18q21.1                        | 6.00             | PR              |
| 227949_at                   | <i>PHACTR3</i>               | 20q13.33                       | 9.46             | LB              |
| 205590_at                   | <i>RASGRP1</i>               | 15q15                          | 6.56             | LB              |
| 217738_at                   | <i>PBEF1</i>                 | 7q22.3                         | 6.55             | LB              |
| 221538_s_at                 | <i>PLXNA1</i>                | 3q21.3                         | 6.44             | LB              |
| 1553380_at                  | <i>PARP15</i>                | 3q21.1                         | 5.95             | LB              |
| 228450_at                   | <i>PLEKHA7</i>               | 11p15.1                        | 5.81             | LB              |
| 231740_at                   | <i>KCNJ11</i>                | 11p15.1                        | 5.75             | LB              |

|             |            |              |       |    |
|-------------|------------|--------------|-------|----|
| 230781_at   | 230781_at  | 4q21.21      | 5.70  | LB |
| 213622_at   | COL9A2     | 1p33-p32     | 5.57  | LB |
| 222802_at   | EDN1       | 6p24.1       | 5.57  | LB |
| 242417_at   | LOC283278  | 11p15.1      | 5.51  | LB |
| 205159_at   | CSF2RB     | 22q13.1      | 5.51  | LB |
| 222453_at   | CYBRD1     | 2q31.1       | 5.47  | LB |
| 209731_at   | NTHL1      | 16p13.3      | 5.34  | LB |
| 218311_at   | MAP4K3     | 2p22.1       | 5.06  | LB |
| 227006_at   | PPP1R14A   | 19q13.1      | 4.81  | LB |
| 227935_s_at | PCGF5      | 10q23.32     | 4.8   | LB |
| 1552388_at  | FLJ30901   | 22q13.31     | 4.79  | LB |
| 227473_at   | CTTN       | 11q13        | 4.79  | LB |
| 1558397_at  | 1558397_at | 17q23.3      | 4.79  | LB |
| 226430_at   | LOC253981  | 4p14         | 4.73  | LB |
| 225613_at   | MAST4      | 5q12.3       | 4.64  | LB |
| 230930_at   | LOC338620  | 10p11.23     | 4.53  | LB |
| 205937_at   | CGREF1     | 2p23.3       | 4.53  | LB |
| 210448_s_at | P2RX5      | 17p13.3      | 4.52  | LB |
| 208614_s_at | FLNB       | 3p14.3       | 4.45  | LB |
| 229359_at   | 229359_at  | 2p23.3       | 4.44  | LB |
| 225990_at   | BOC        | 3q13.2       | 4.43  | LB |
| 205780_at   | BIK        | 22q13.31     | 4.35  | LB |
| 229067_at   | 229067_at  | 1            | 4.31  | LB |
| 230083_at   | USP53      | 4q26         | 4.30  | LB |
| 225282_at   | SMAP1L     | 1p35.3-p34.1 | 4.28  | LB |
| 239230_at   | HES5       | 1p36.32      | 4.28  | LB |
| 202088_at   | SLC39A6    | 18q12.2      | 4.25  | LB |
| 228360_at   | LOC130576  | 2q23.3       | 4.24  | LB |
| 202484_s_at | MBD2       | 18q21        | 4.23  | LB |
| 34726_at    | CACNB3     | 12q13        | 4.23  | LB |
| 213424_at   | KIAA0895   | 7p14.1       | 4.21  | LB |
| 219561_at   | COPZ2      | 17q21.32     | 4.18  | LB |
| 235427_at   | 235427_at  | 2q33.1       | 4.17  | LB |
| 205190_at   | PLS1       | 3q23         | 4.17  | LB |
| 212614_at   | ARID5B     | 10q21.2      | 4.16  | LB |
| 236782_at   | SAMD3      | 6q23.1       | 4.15  | LB |
| 227019_at   | LOC400793  | 1q23.3       | 4.10  | LB |
| 229552_at   | LOC283454  | 12q24.23     | 4.09  | LB |
| 1568955_at  | 1568955_at | 1            | 4.08  | LB |
| 213411_at   | ADAM22     | 7q21         | 4.02  | LB |
| 215734_at   | C19orf36   | 19p13.3      | 4.01  | LB |
| 202986_at   | ARNT2      | 15q24        | 4.01  | LB |
| 229070_at   | C6orf105   | 6p24.1       | 3.99  | LB |
| 222777_s_at | WHSC1      | 4p16.3       | 23.19 | MS |
| 204379_s_at | FGFR3      | 4p16.3       | 18.32 | MS |
| 217867_x_at | BACE2      | 21q22.3      | 11.94 | MS |
| 217901_at   | DSG2       | 18q12.1      | 11.61 | MS |
| 211709_s_at | CLEC11A    | 19q13.3      | 10.53 | MS |
| 204066_s_at | CENTG2     | 2p24.3-p24.1 | 10.19 | MS |
| 214156_at   | MYRIP      | 3p22.2-p22.1 | 9.26  | MS |
| 210220_at   | FZD2       | 17q21.1      | 8.99  | MS |
| 212190_at   | SERPINE2   | 2q33-q35     | 8.93  | MS |
| 204749_at   | NAP1L3     | Xq21.3-q22   | 8.87  | MS |
| 212771_at   | C10orf38   | 10p13        | 8.62  | MS |
| 212813_at   | JAM3       | 11q25        | 8.42  | MS |
| 241703_at   | RPIB9      | 7q21.12      | 8.24  | MS |
| 232235_at   | C18orf4    | 18q22.1      | 8.09  | MS |
| 217963_s_at | NGFRAP1    | Xq22.2       | 7.99  | MS |
| 215047_at   | TRIM58     | 1q44         | 7.97  | MS |

|             |                  |               |       |    |
|-------------|------------------|---------------|-------|----|
| 224325_at   | <i>FZD8</i>      | 10p11.21      | 7.88  | MS |
| 212148_at   | <i>PBX1</i>      | 1q23          | 7.66  | MS |
| 205559_s_at | <i>PCSK5</i>     | 9q21.3        | 7.56  | MS |
| 205830_at   | <i>CLGN</i>      | 4q28.3-q31.1  | 7.55  | MS |
| 219440_at   | <i>RAI2</i>      | Xp22          | 7.50  | MS |
| 218345_at   | <i>HCA112</i>    | 7q36.1        | 7.47  | MS |
| 212686_at   | <i>PPM1H</i>     | 12q14.1-q14.2 | 7.44  | MS |
| 227195_at   | <i>ZNF503</i>    | 10q22.2       | 7.44  | MS |
| 201360_at   | <i>CST3</i>      | 20p11.21      | 7.35  | MS |
| 218775_s_at | <i>BOMB</i>      | 4q35.1        | 7.33  | MS |
| 227084_at   | <i>DTNA</i>      | 18q12         | 7.26  | MS |
| 229782_at   | <i>NCRMS</i>     | 12q23.1       | 7.21  | MS |
| 219631_at   | <i>LRP12</i>     | 8q22.2-q23.1  | 7.18  | MS |
| 205011_at   | <i>LOH11CR2A</i> | 11q23         | 7.17  | MS |
| 227875_at   | <i>KLHL13</i>    | Xq23-q24      | 7.16  | MS |
| 241535_at   | <i>241535_at</i> | 2p25.3        | 7.13  | MS |
| 226066_at   | <i>MITF</i>      | 3p14.2-p14.1  | 7.12  | MS |
| 229874_x_at | <i>LOC400741</i> | 1p36.13       | 7.09  | MS |
| 220991_s_at | <i>RNF32</i>     | 7q36.3        | 7.03  | MS |
| 227290_at   | <i>227290_at</i> | 16q23.2       | 7.00  | MS |
| 226677_at   | <i>ZNF521</i>    | 18q11.2       | 6.97  | MS |
| 227742_at   | <i>CLIC6</i>     | 21q22.12      | 6.93  | MS |
| 202599_s_at | <i>NRIP1</i>     | 21q11.2       | 6.84  | MS |
| 204011_at   | <i>SPRY2</i>     | 13q31.1       | 6.69  | MS |
| 211276_at   | <i>TCEAL2</i>    | Xq22.1-q22.3  | 6.66  | MS |
| 218675_at   | <i>SLC22A17</i>  | 14q11.2       | 6.65  | MS |
| 201976_s_at | <i>MYO10</i>     | 5p15.1-p14.3  | 6.64  | MS |
| 200897_s_at | <i>KIAA0992</i>  | 4q32.3        | 6.63  | MS |
| 224955_at   | <i>TEAD1</i>     | 11p15.4       | 6.61  | MS |
| 221047_s_at | <i>MARK1</i>     | 1q41          | 6.60  | MS |
| 227341_at   | <i>C10orf30</i>  | 10p13         | 6.60  | MS |
| 220532_s_at | <i>LR8</i>       | 7q36.1        | 6.58  | MS |
| 236565_s_at | <i>LARP6</i>     | 15q23         | 6.54  | MS |
| 225474_at   | <i>MAGI1</i>     | 3p14.1        | 6.48  | MS |
| 204115_at   | <i>GNG11</i>     | 7q31-q32      | 12.48 | HP |
| 232352_at   | <i>ISL2</i>      | 15q23         | 12.00 | HP |
| 202688_at   | <i>TNFSF10</i>   | 3q26          | 11.93 | HP |
| 225698_at   | <i>TIGA1</i>     | 5q21-q22      | 10.19 | HP |
| 224961_at   | <i>SCYL2</i>     | 12q23.1       | 10.18 | HP |
| 209595_at   | <i>GTF2F2</i>    | 13q14         | 10.00 | HP |
| 230479_at   | <i>230479_at</i> | 11p15.4       | 9.35  | HP |
| 224767_at   | <i>RPL37</i>     | 5p13          | 9.29  | HP |
| 203620_s_at | <i>FCHSD2</i>    | 11q13.4       | 9.15  | HP |
| 211434_s_at | <i>CCRL2</i>     | 3p21          | 9.03  | HP |
| 226507_at   | <i>PAK1</i>      | 11q13-q14     | 9.03  | HP |
| 219734_at   | <i>SIDT1</i>     | 3q13.2        | 9.02  | HP |
| 227180_at   | <i>ELOVL7</i>    | 5q12.1        | 8.92  | HP |
| 203989_x_at | <i>F2R</i>       | 5q13          | 8.91  | HP |
| 208745_at   | <i>ATP5L</i>     | 11q23.3       | 8.86  | HP |
| 244632_at   | <i>CNTN5</i>     | 11q21-q22.2   | 8.81  | HP |
| 227056_at   | <i>KIAA0141</i>  | 5q31.3        | 8.74  | HP |
| 203698_s_at | <i>FRZB</i>      | 2qter         | 8.71  | HP |
| 230425_at   | <i>EPHB1</i>     | 3q21-q23      | 8.70  | HP |
| 222943_at   | <i>GBA3</i>      | 4p15.31       | 8.63  | HP |
| 229050_s_at | <i>MGC16037</i>  | 9q34.3        | 8.63  | HP |
| 219122_s_at | <i>ICF45</i>     | 5q33.3        | 8.62  | HP |
| 227979_at   | <i>RBM30</i>     | 11q13         | 8.59  | HP |
| 222793_at   | <i>DDX58</i>     | 9p12          | 8.53  | HP |
| 234339_s_at | <i>GLTSCR2</i>   | 19q13.3       | 8.48  | HP |

|              |                       |               |      |      |
|--------------|-----------------------|---------------|------|------|
| 224610_at    | 224610_at             | 11q12.3       | 8.47 | HP   |
| 204236_at    | <i>FLI1</i>           | 11q24.1-q24.3 | 8.38 | HP   |
| 235228_at    | <i>KIAA1912</i>       | 2p16.1        | 8.30 | HP   |
| 238039_at    | 238039_at             | 5q14.1        | 8.28 | HP   |
| 216348_at    | <i>RPS17</i>          | 15q           | 8.27 | HP   |
| 217969_at    | <i>C11orf2</i>        | 11q13         | 8.24 | HP   |
| 210813_s_at  | <i>XRCC4</i>          | 5q13-q14      | 8.23 | HP   |
| 213554_s_at  | <i>H41</i>            | 3q22.1        | 8.22 | HP   |
| 203528_at    | <i>SEMA4D</i>         | 9q22-q31      | 8.15 | HP   |
| 200715_x_at  | <i>RPL13A</i>         | 19q13.3       | 8.10 | HP   |
| 227867_at    | <i>LOC129293</i>      | 2p11.2        | 8.09 | HP   |
| 242625_at    | <i>RSAD2</i>          | 2p25.2        | 8.08 | HP   |
| 220201_at    | <i>MNAB</i>           | 9q34          | 7.95 | HP   |
| 220768_s_at  | <i>CSNK1G3</i>        | 5q23          | 7.93 | HP   |
| 206486_at    | <i>LAG3</i>           | 12p13.32      | 7.86 | HP   |
| 205632_s_at  | <i>PIP5K1B</i>        | 9q13          | 7.86 | HP   |
| 234875_at    | <i>RPL7A</i>          | 9q34          | 7.8  | HP   |
| 228607_at    | <i>OAS2</i>           | 12q24.2       | 7.75 | HP   |
| 206991_s_at  | <i>CCR5</i>           | 3p21          | 7.72 | HP   |
| 224915_x_at  | <i>TALDO1</i>         | 11p15.5-p15.4 | 7.72 | HP   |
| 216399_s_at  | <i>ZNF291</i>         | 15q24         | 7.63 | HP   |
| 200995_at    | <i>IPO7</i>           | 11p15.4       | 7.63 | HP   |
| 218258_at    | <i>POLR1D</i>         | 13q12.2       | 7.57 | HP   |
| 222108_at    | <i>AMIGO2</i>         | 12q13.11      | 7.56 | HP   |
| 205569_at    | <i>LAMP3</i>          | 3q26.3-q27    | 7.52 | HP   |
| 1553027_a_at | <i>KLHL4</i>          | Xq21.3        | 8.21 | CD-1 |
| 229309_at    | <i>ADRB1</i>          | 10q24-q26     | 7.87 | CD-1 |
| 210587_at    | <i>INHBE</i>          | 12q13.3       | 7.74 | CD-1 |
| 203423_at    | <i>RBP1</i>           | 3q23          | 7.57 | CD-1 |
| 233500_x_at  | <i>CLEC2D</i>         | 12p13         | 7.52 | CD-1 |
| 209921_at    | <i>SLC7A11</i>        | 4q28-q32      | 6.92 | CD-1 |
| 213524_s_at  | <i>G0S2</i>           | 1q32.2-q41    | 6.65 | CD-1 |
| 212713_at    | <i>MFAP4</i>          | 17p11.2       | 6.59 | CD-1 |
| 220993_s_at  | <i>GPR63</i>          | 6q16.1-q16.3  | 6.53 | CD-1 |
| 227915_at    | <i>ASB2</i>           | 14q31-q32     | 6.20 | CD-1 |
| 228737_at    | <i>C20orf100</i>      | 20q13.12      | 5.98 | CD-1 |
| 210105_s_at  | <i>FYN</i>            | 6q21          | 5.93 | CD-1 |
| 228367_at    | <i>ALPK2</i>          | 18q21.31      | 5.88 | CD-1 |
| 206631_at    | <i>PTGER2</i>         | 14q22         | 5.85 | CD-1 |
| 222116_s_at  | <i>TBC1D16</i>        | 17q25.3       | 5.84 | CD-1 |
| 217127_at    | <i>CTH</i>            | 1p31.1        | 5.77 | CD-1 |
| 221539_at    | <i>EIF4EBP1</i>       | 8p12          | 5.69 | CD-1 |
| 219892_at    | <i>TM6SF1</i>         | 15q24-q26     | 5.53 | CD-1 |
| 227353_at    | 227353_at             | 17q25.3       | 5.48 | CD-1 |
| 239062_at    | 239062_at             | 17q25.3       | 5.48 | CD-1 |
| 232054_at    | <i>PCDH20</i>         | 13q21         | 5.42 | CD-1 |
| 212501_at    | <i>CEBPB (NF-IL6)</i> | 20q13.1       | 5.25 | CD-1 |
| 204328_at    | <i>EVER1</i>          | 17q25.3       | 5.24 | CD-1 |
| 201036_s_at  | <i>HADHSC</i>         | 4q22-q26      | 5.21 | CD-1 |
| 243816_at    | <i>ZNF70</i>          | 22q11.2       | 5.20 | CD-1 |
| 202847_at    | <i>PCK2</i>           | 14q11.2       | 5.15 | CD-1 |
| 224839_s_at  | <i>GPT2</i>           | 16q12.1       | 5.10 | CD-1 |
| 227134_at    | <i>SYTL1</i>          | 1p36.11       | 5.10 | CD-1 |
| 201397_at    | <i>PHGDH</i>          | 1p12          | 5.07 | CD-1 |
| 204114_at    | <i>NID2</i>           | 14q21-q22     | 5.03 | CD-1 |
| 227117_at    | <i>XPOT</i>           | 12q14.2       | 5.02 | CD-1 |
| 223195_s_at  | <i>SESN2</i>          | 1p35.3        | 5.01 | CD-1 |
| 238983_at    | <i>FLJ14001</i>       | 4p14          | 5.01 | CD-1 |
| 204999_s_at  | <i>ATF5</i>           | 19q13.3       | 4.88 | CD-1 |

|              |                        |              |       |      |
|--------------|------------------------|--------------|-------|------|
| 206039_at    | <i>RAB33A</i>          | Xq25         | 4.80  | CD-1 |
| 217763_s_at  | <i>RAB31</i>           | 18p11.3      | 4.76  | CD-1 |
| 235522_at    | <i>OCIL</i>            | 12p13        | 4.69  | CD-1 |
| 227823_at    | <i>RGAG4</i>           | Xq13.1       | 4.68  | CD-1 |
| 218145_at    | <i>TRIB3</i>           | 20p13-p12.2  | 4.67  | CD-1 |
| 206956_at    | <i>BGLAP</i>           | 1q25-q31     | 4.61  | CD-1 |
| 220358_at    | <i>SNFT</i>            | 1q32.3       | 4.58  | CD-1 |
| 228024_at    | <i>228024_at</i>       | 8p22         | 4.56  | CD-1 |
| 239045_at    | <i>ERN1</i>            | 17q24.2      | 4.5   | CD-1 |
| 212767_at    | <i>GTPBP7</i>          | 10q26.3      | 4.5   | CD-1 |
| 203438_at    | <i>STC2</i>            | 5q35.1       | 4.49  | CD-1 |
| 213475_s_at  | <i>ITGAL</i>           | 16p11.2      | 4.44  | CD-1 |
| 227630_at    | <i>PPP2R5E</i>         | 14q23.1      | 4.43  | CD-1 |
| 204971_at    | <i>CSTA</i>            | 3q21         | 4.39  | CD-1 |
| 236554_x_at  | <i>EVER2</i>           | 17q25.3      | 4.39  | CD-1 |
| 240094_at    | <i>DJ971N18.2</i>      | 20p12        | 4.37  | CD-1 |
| 228592_at    | <i>MS4A1</i>           | 11q12        | 10.95 | CD-2 |
| 220068_at    | <i>VPREB3</i>          | 22q11.23     | 10.83 | CD-2 |
| 227336_at    | <i>DTX1</i>            | 12q24.13     | 10.4  | CD-2 |
| 1558185_at   | <i>CLU1</i>            | 12q22        | 8.93  | CD-2 |
| 236065_at    | <i>236065_at</i>       | 12q12        | 8.57  | CD-2 |
| 212807_s_at  | <i>SORT1</i>           | 1p21.3-p13.1 | 8.45  | CD-2 |
| 1556583_a_at | <i>1556583_a_at</i>    | 2p22.1       | 7.85  | CD-2 |
| 221969_at    | <i>PAX5</i>            | 9p13         | 7.72  | CD-2 |
| 213324_at    | <i>SRC</i>             | 20q12-q13    | 6.94  | CD-2 |
| 212158_at    | <i>SDC2</i>            | 8q22-q23     | 6.92  | CD-2 |
| 225955_at    | <i>METRNL</i>          | 17q25.3      | 6.89  | CD-2 |
| 219670_at    | <i>C1orf165</i>        | 1p33         | 6.78  | CD-2 |
| 213436_at    | <i>CNR1</i>            | 6q14-q15     | 6.75  | CD-2 |
| 208703_s_at  | <i>APLP2</i>           | 11q23-q25    | 6.67  | CD-2 |
| 238452_at    | <i>FCRLM2</i>          | 1q23.3       | 6.66  | CD-2 |
| 212678_at    | <i>NF1</i>             | 17q11.2      | 6.62  | CD-2 |
| 205901_at    | <i>PNOC</i>            | 8p21         | 6.58  | CD-2 |
| 206150_at    | <i>TNFRSF7 (CD27L)</i> | 12p13        | 6.57  | CD-2 |
| 212226_s_at  | <i>PPAP2B</i>          | 1pter-p22.1  | 6.55  | CD-2 |
| 225897_at    | <i>MARCKS</i>          | 6q22.2       | 6.51  | CD-2 |
| 216840_s_at  | <i>LAMA2</i>           | 6q22-q23     | 6.45  | CD-2 |
| 208890_s_at  | <i>PLXNB2</i>          | 22q13.33     | 6.44  | CD-2 |
| 207511_s_at  | <i>C2orf24</i>         | 2q35         | 6.38  | CD-2 |
| 243780_at    | <i>243780_at</i>       | 22q13.2      | 6.36  | CD-2 |
| 205049_s_at  | <i>CD79A</i>           | 19q13.2      | 6.35  | CD-2 |
| 204759_at    | <i>RCBTB2</i>          | 13q14.3      | 6.33  | CD-2 |
| 213407_at    | <i>PHLPPL</i>          | 16q22.2      | 6.15  | CD-2 |
| 1560225_at   | <i>1560225_at</i>      | 6q15         | 6.14  | CD-2 |
| 238893_at    | <i>LOC338758</i>       | 12q21.33     | 6.09  | CD-2 |
| 204208_at    | <i>RNGTT</i>           | 6q16         | 6.02  | CD-2 |
| 238282_at    | <i>238282_at</i>       | 3q26.32      | 5.95  | CD-2 |
| 227396_at    | <i>227396_at</i>       | 11p11.2      | 5.91  | CD-2 |
| 235764_at    | <i>235764_at</i>       | 4q27         | 5.83  | CD-2 |
| 202969_at    | <i>DYRK2</i>           | 12q15        | 5.82  | CD-2 |
| 211812_s_at  | <i>B3GALT3</i>         | 3q25         | 5.77  | CD-2 |
| 232693_s_at  | <i>ZNF395</i>          | 8p21.1       | 5.76  | CD-2 |
| 204352_at    | <i>TRAF5</i>           | 1q32         | 5.76  | CD-2 |
| 219888_at    | <i>SPAG4</i>           | 20q11.21     | 5.75  | CD-2 |
| 226325_at    | <i>ADSSL1</i>          | 14q32.33     | 5.74  | CD-2 |
| 226459_at    | <i>PIK3AP1</i>         | 10q24.1      | 5.66  | CD-2 |
| 220595_at    | <i>PDZRN4</i>          | 12q12        | 5.65  | CD-2 |
| 229817_at    | <i>ZNF608</i>          | 5q23.2       | 5.65  | CD-2 |
| 210258_at    | <i>RGS13</i>           | 1q31.2       | 5.64  | CD-2 |

|              |                          |               |       |      |
|--------------|--------------------------|---------------|-------|------|
| 203313_s_at  | <i>TGIF</i>              | 18p11.3       | 5.64  | CD-2 |
| 218231_at    | <i>NAGK</i>              | 2p13.3        | 5.63  | CD-2 |
| 226440_at    | <i>DUSP22</i>            | 6p25.3        | 5.63  | CD-2 |
| 207216_at    | <i>TNFSF8 (CD30L)</i>    | 9q33          | 5.63  | CD-2 |
| 200940_s_at  | <i>RERE</i>              | 1p36.1-p36.2  | 5.62  | CD-2 |
| 227094_at    | <i>DHTKD1</i>            | 10p14         | 5.61  | CD-2 |
| 203723_at    | <i>ITPKB</i>             | 1q42.13       | 5.57  | CD-2 |
| 205898_at    | <i>CX3CR1</i>            | 3p21          | 14.68 | MF   |
| 1554485_s_at | <i>TMEM37</i>            | 2q14.2        | 14.14 | MF   |
| 204589_at    | <i>NUAK1 (ARK5)</i>      | 12q23.3       | 13.46 | MF   |
| 209167_at    | <i>GPM6B</i>             | Xp22.2        | 12.32 | MF   |
| 221060_s_at  | <i>TLR4</i>              | 9q32-q33      | 12.25 | MF   |
| 205718_at    | <i>ITGB7</i>             | 12q13.13      | 11.92 | MF   |
| 215294_s_at  | <i>SMARCA1</i>           | Xq25          | 11.86 | MF   |
| 213138_at    | <i>ARID5A</i>            | 2q11.2        | 11.75 | MF   |
| 221796_at    | <i>NTRK2</i>             | 9q22.1        | 10.31 | MF   |
| 51158_at     | <i>LOC400451</i>         | 15q26.1       | 10.27 | MF   |
| 209875_s_at  | <i>SPP1</i>              | 4q21-q25      | 9.99  | MF   |
| 1570445_a_at | <i>1570445_a_at</i>      | 5q35.2        | 9.42  | MF   |
| 1569785_at   | <i>1569785_at</i>        | 18q12.3       | 9.40  | MF   |
| 235740_at    | <i>MCTP1</i>             | 5q15          | 9.37  | MF   |
| 205862_at    | <i>GREB1</i>             | 2p25.1        | 9.35  | MF   |
| 207638_at    | <i>PRSS7</i>             | 21q21         | 9.32  | MF   |
| 200762_at    | <i>DPYSL2</i>            | 8p22-p21      | 9.31  | MF   |
| 224583_at    | <i>COTL1</i>             | 16q24.1       | 9.09  | MF   |
| 203658_at    | <i>SLC25A20</i>          | 3p21.31       | 8.79  | MF   |
| 203119_at    | <i>MGC2574</i>           | 11q12.2       | 8.72  | MF   |
| 235416_at    | <i>LOC441117</i>         | 5q35.2        | 8.70  | MF   |
| 207356_at    | <i>DEFB4</i>             | 8p23.1-p22    | 8.59  | MF   |
| 209980_s_at  | <i>SHMT1</i>             | 17p11.2       | 8.48  | MF   |
| 203417_at    | <i>MFAP2</i>             | 1p36.1-p35    | 8.27  | MF   |
| 225868_at    | <i>TRIM47</i>            | 17q25.1       | 8.23  | MF   |
| 221887_s_at  | <i>DFNB31</i>            | 9q32-q34      | 8.13  | MF   |
| 203973_s_at  | <i>CEBPD</i>             | 8p11.2-p11.1  | 8.01  | MF   |
| 212098_at    | <i>LOC151162</i>         | 2q21.3        | 7.96  | MF   |
| 226436_at    | <i>RASSF4</i>            | 10q11.21      | 7.89  | MF   |
| 228123_s_at  | <i>C20orf22</i>          | 20p11.21      | 7.46  | MF   |
| 201131_s_at  | <i>CDH1 (E-cadherin)</i> | 16q22.1       | 7.43  | MF   |
| 201954_at    | <i>ARPC1B</i>            | 7q22.1        | 7.42  | MF   |
| 219895_at    | <i>FAM70A</i>            | Xq24          | 7.41  | MF   |
| 222930_s_at  | <i>AGMAT</i>             | 1p36.13       | 7.39  | MF   |
| 226545_at    | <i>CD109</i>             | 6q13          | 7.30  | MF   |
| 206023_at    | <i>NMU</i>               | 4q12          | 7.26  | MF   |
| 219310_at    | <i>C20orf39</i>          | 20p11.21      | 7.22  | MF   |
| 214023_x_at  | <i>TUBB-PARALOG</i>      | 6p25          | 7.16  | MF   |
| 204858_s_at  | <i>ECGF1</i>             | 22q13         | 7.15  | MF   |
| 205003_at    | <i>DOCK4</i>             | 7q31.1        | 7.10  | MF   |
| 209687_at    | <i>CXCL12 (SDF-1)</i>    | 10q11.1       | 7.08  | MF   |
| 200965_s_at  | <i>ABLIM1</i>            | 10q25         | 7.06  | MF   |
| 206167_s_at  | <i>ARHGAP6</i>           | Xp22.3        | 7.02  | MF   |
| 213566_at    | <i>RNASE6</i>            | 14q11.2       | 7.02  | MF   |
| 211941_s_at  | <i>PBP</i>               | 12q24.23      | 7.00  | MF   |
| 218608_at    | <i>ATP13A2</i>           | 1p36          | 6.99  | MF   |
| 210873_x_at  | <i>APOBEC3A</i>          | 22q13.1-q13.2 | 6.88  | MF   |
| 201481_s_at  | <i>PYGB</i>              | 20p11.2-p11.1 | 6.80  | MF   |
| 205269_at    | <i>LCP2</i>              | 5q33.1-qter   | 6.79  | MF   |
| 223121_s_at  | <i>SFRP2</i>             | 4q31.3        | 6.72  | MF   |
