# Supplementary material
Source: PubMed Central journal article supplement (PMC1895543)
Supplement: blood_blood-2005-11-013458_3.pdf [file blood_blood-2005-11-013458_3.pdf]

| <b>Affymetrix Probe Set</b> | <b>Gene Name / Probe Set</b> | <b>Chromosome Map Position</b> | <b>SAM Score</b> | <b>Subgroup</b> |
|-----------------------------|------------------------------|--------------------------------|------------------|-----------------|
| 212914_at                   | <i>CBX7</i>                  | 22q13.1                        | -7.49            | PR              |
| 217887_s_at                 | <i>EPS15</i>                 | 1p32                           | -6.06            | PR              |
| 204588_s_at                 | <i>SLC7A7</i>                | 14q11.2                        | -5.77            | PR              |
| 215836_s_at                 | <i>PCDHGC3</i>               | 5q31                           | -5.48            | PR              |
| 223681_s_at                 | <i>INADL</i>                 | 1p31.3                         | -5.42            | PR              |
| 228258_at                   | <i>TBC1D10C</i>              | 11q13.2                        | -5.39            | PR              |
| 204422_s_at                 | <i>FGF2</i>                  | 4q26-q27                       | -5.25            | PR              |
| 230559_x_at                 | <i>FGD4</i>                  | 12p11.21                       | -5.21            | PR              |
| 219144_at                   | <i>DUSP26</i>                | 8p12                           | -5.18            | PR              |
| 204646_at                   | <i>DPYD</i>                  | 1p22                           | -5.14            | PR              |
| 225166_at                   | <i>ARHGAP18</i>              | 6q22.33                        | -5.08            | PR              |
| 212690_at                   | <i>DDHD2</i>                 | 8p12                           | -5.06            | PR              |
| 222495_at                   | <i>C1orf119</i>              | 1p13.3                         | -4.97            | PR              |
| 203556_at                   | <i>ZHX2</i>                  | 8q24.13                        | -4.96            | PR              |
| 226612_at                   | <i>FLJ25076</i>              | 5p15.31                        | -4.96            | PR              |
| 227066_at                   | <i>MOBK2C</i>                | 1p33                           | -4.89            | PR              |
| 210001_s_at                 | <i>SOCS1</i>                 | 16p13.13                       | -4.86            | PR              |
| 205383_s_at                 | <i>ZBTB20</i>                | 3q13.2                         | -4.86            | PR              |
| 238624_at                   | <i>NLK</i>                   | 17q11.2                        | -4.82            | PR              |
| 227999_at                   | <i>PWWP2</i>                 | 10q26.3                        | -4.74            | PR              |
| 228243_at                   | <i>PAXIP1L</i>               | 7q36                           | -4.73            | PR              |
| 229114_at                   | <i>GAB1</i>                  | 4q31.21                        | -4.67            | PR              |
| 203080_s_at                 | <i>BAZ2B</i>                 | 2q23-q24                       | -4.67            | PR              |
| 212614_at                   | <i>ARID5B</i>                | 10q21.2                        | -4.66            | PR              |
| 226384_at                   | <i>PPAPDC1B</i>              | 8p12                           | -4.64            | PR              |
| 225282_at                   | <i>SMAP1L</i>                | 1p35.3-p34.1                   | -4.60            | PR              |
| 221763_at                   | <i>JMJD1C</i>                | 10q21.3                        | -4.60            | PR              |
| 225540_at                   | <i>MAP2</i>                  | 2q34-q35                       | -4.54            | PR              |
| 235971_at                   | <i>TIFA</i>                  | 4q25                           | -4.53            | PR              |
| 50221_at                    | <i>TFEB</i>                  | 6p21                           | -4.51            | PR              |
| 201952_at                   | <i>ALCAM</i>                 | 3q13.1                         | -4.46            | PR              |
| 202761_s_at                 | <i>SYNE2</i>                 | 14q23.2                        | -4.43            | PR              |
| 207655_s_at                 | <i>BLNK</i>                  | 10q23.2-q23.33                 | -4.42            | PR              |
| 226773_at                   | <i>226773_at</i>             | 4q22.1                         | -4.42            | PR              |
| 39582_at                    | <i>CYLD</i>                  | 16q12-q13                      | -4.39            | PR              |
| 241859_at                   | <i>241859_at</i>             | 2q33.1                         | -4.39            | PR              |
| 226641_at                   | <i>LOC91526</i>              | 2q33.1                         | -4.39            | PR              |
| 203845_at                   | <i>PCAF</i>                  | 3p24                           | -4.38            | PR              |
| 40446_at                    | <i>PHF1</i>                  | 6p21.3                         | -4.33            | PR              |
| 227209_at                   | <i>CNTN1</i>                 | 12q11-q12                      | -4.32            | PR              |
| 213694_at                   | <i>RSBN1</i>                 | 1p13.2                         | -4.30            | PR              |
| 205801_s_at                 | <i>RASGRP3</i>               | 2p25.1-p24.1                   | -4.26            | PR              |
| 212842_x_at                 | <i>RANBP2L1</i>              | 2q13                           | -4.25            | PR              |
| 230011_at                   | <i>MGC40042</i>              | 22q13.2                        | -4.25            | PR              |
| 205259_at                   | <i>NR3C2</i>                 | 4q31.1                         | -4.25            | PR              |
| 209090_s_at                 | <i>SH3GLB1</i>               | 1p22                           | -4.23            | PR              |
| 1557257_at                  | <i>BCL10</i>                 | 1p22                           | -4.23            | PR              |
| 204276_at                   | <i>TK2</i>                   | 16q22-q23.1                    | -4.21            | PR              |
| 205277_at                   | <i>PRDM2 (TSG)</i>           | 1p36                           | -4.20            | PR              |
| 203408_s_at                 | <i>SATB1</i>                 | 3p23                           | -4.20            | PR              |
| 222001_x_at                 | <i>222001_x_at</i>           | 1q21.1                         | -7.44            | LB              |
| 1568609_s_at                | <i>FAM91A2</i>               | 1q21.1                         | -7.22            | LB              |
| 206978_at                   | <i>CCR2</i>                  | 3p21                           | -6.61            | LB              |
| 208892_s_at                 | <i>DUSP6</i>                 | 12q22-q23                      | -6.42            | LB              |
| 202145_at                   | <i>LY6E</i>                  | 8q24.3                         | -6.41            | LB              |
| 204960_at                   | <i>PTPRCAP</i>               | 11q13.3                        | -6.15            | LB              |
| 208941_s_at                 | <i>SEPHS1</i>                | 10p14                          | -5.97            | LB              |

|             |             |               |        |    |
|-------------|-------------|---------------|--------|----|
| 219895_at   | FAM70A      | Xq24          | -5.92  | LB |
| 229872_s_at | LOC440667   | 1q21.1        | -5.81  | LB |
| 221058_s_at | CKLF        | 16q22.1       | -5.67  | LB |
| 202391_at   | BASP1       | 5p15.1-p14    | -5.60  | LB |
| 219684_at   | IFRG28      | 3q27.3        | -5.52  | LB |
| 209310_s_at | CASP4       | 11q22.2-q22.3 | -5.48  | LB |
| 217437_s_at | TACC1       | 8p11          | -5.40  | LB |
| 240890_at   | 240890_at   | 11q22.3       | -5.35  | LB |
| 231899_at   | ZC3H12C     | 11q22.3       | -5.29  | LB |
| 219033_at   | PARP8       | 5q11.1        | -5.10  | LB |
| 209969_s_at | STAT1       | 2q32.2        | -5.07  | LB |
| 228617_at   | BIRC4BP     | 17p13.1       | -5.04  | LB |
| 204994_at   | MX2         | 21q22.3       | -4.93  | LB |
| 244008_at   | 244008_at   | 5q11.1        | -4.93  | LB |
| 236704_at   | 236704_at   | 1q21.1        | -4.76  | LB |
| 229429_x_at | 229429_x_at | 1q21.1        | -4.72  | LB |
| 227383_at   | 227383_at   | 1q21.1        | -4.70  | LB |
| 202664_at   | WASPIP      | 2q31.1        | -4.69  | LB |
| 202411_at   | IFI27       | 14q32         | -4.66  | LB |
| 204352_at   | TRAF5       | 1q32          | -4.60  | LB |
| 203595_s_at | IFIT5       | 10q23.31      | -4.56  | LB |
| 218918_at   | MAN1C1      | 1p35          | -4.52  | LB |
| 227384_s_at | 227384_s_at | 1q21.1        | -4.50  | LB |
| 242625_at   | RSAD2       | 2p25.2        | -4.50  | LB |
| 232615_at   | FLJ39739    | 1q21.1        | -4.49  | LB |
| 225701_at   | AKNA        | 9q32          | -4.49  | LB |
| 204415_at   | G1P3        | 1p35          | -4.42  | LB |
| 200625_s_at | CAP1        | 1p34.2        | -4.41  | LB |
| 200989_at   | HIF1A       | 14q21-q24     | -4.39  | LB |
| 214472_at   | HIST1H3D    | 6p21.3        | -4.23  | LB |
| 238148_s_at | FLJ46385    | 19q13.42      | -4.22  | LB |
| 240122_at   | 240122_at   | 9q22.2        | -4.22  | LB |
| 240586_at   | ENAM        | 4q13.3        | -4.15  | LB |
| 209417_s_at | IFI35       | 17q21         | -4.14  | LB |
| 202531_at   | IRF1        | 5q31.1        | -4.09  | LB |
| 225636_at   | STAT2       | 12q13.3       | -4.08  | LB |
| 218986_s_at | FLJ20035    | 4q32.3        | -4.05  | LB |
| 219357_at   | GTPBP1      | 22q13.1       | -4.02  | LB |
| 202659_at   | PSMB10      | 16q22.1       | -4.00  | LB |
| 226748_at   | LYSMD2      | 15q21.2       | -3.99  | LB |
| 219211_at   | USP18       | 22q11.21      | -3.99  | LB |
| 212124_at   | RAI17       | 10q22.3       | -3.98  | LB |
| 227798_at   | SMAD1       | 4q31          | -3.98  | LB |
| 225530_at   | MOBK12A     | 19p13.3       | -13.08 | MS |
| 208657_s_at | 208657_s_at | 17q25         | -11.36 | MS |
| 41220_at    | 41220_at    | 17q25         | -9.94  | MS |
| 200736_s_at | GPX1        | 3p21.3        | -8.41  | MS |
| 211967_at   | PORIMIN     | 11q22.1       | -8.02  | MS |
| 202976_s_at | RHOBTB3     | 5q15          | -7.71  | MS |
| 230748_at   | SLC16A6     | 17q24.2       | -6.95  | MS |
| 226018_at   | E11s1       | 7p15.1        | -6.44  | MS |
| 1555882_at  | SPIN3       | Xp11.1        | -6.31  | MS |
| 217466_x_at | RPS2        | 16p13.3       | -6.25  | MS |
| 232352_at   | ISL2        | 15q23         | -6.20  | MS |
| 218258_at   | POLR1D      | 13q12.2       | -6.15  | MS |
| 223206_s_at | HSCARG      | 16p13.3       | -6.14  | MS |
| 223751_x_at | TLR10       | 4p14          | -6.14  | MS |
| 221969_at   | PAX5        | 9p13          | -6.11  | MS |
| 226707_at   | NAPRT1      | 8q24.3        | -6.10  | MS |

|              |                      |               |        |    |
|--------------|----------------------|---------------|--------|----|
| 224814_at    | <i>DPP7</i>          | 9q34.3        | -6.07  | MS |
| 209798_at    | <i>NPAT</i>          | 11q22-q23     | -6.05  | MS |
| 201334_s_at  | <i>ARHGEF12</i>      | 11q23.3       | -5.89  | MS |
| 1554015_a_at | <i>CHD2</i>          | 15q26         | -5.81  | MS |
| 213083_at    | <i>SLC35D2</i>       | 9q22.32       | -5.80  | MS |
| 219069_at    | <i>ANKRD49</i>       | 11q21         | -5.80  | MS |
| 206609_at    | <i>MAGEC1</i>        | Xq26          | -5.68  | MS |
| 238012_at    | <i>238012_at</i>     | 9q34.3        | -5.65  | MS |
| 226123_at    | <i>CHD7</i>          | 8q12.2        | -5.61  | MS |
| 207194_s_at  | <i>ICAM4</i>         | 19p13.2-cen   | -5.60  | MS |
| 223606_x_at  | <i>KIAA1704</i>      | 13q13-q14     | -5.58  | MS |
| 235764_at    | <i>235764_at</i>     | 4q27          | -5.51  | MS |
| 218826_at    | <i>SLC35F2</i>       | 11q22.3       | -5.51  | MS |
| 228252_at    | <i>C15orf20</i>      | 15q22.31      | -5.45  | MS |
| 222728_s_at  | <i>MGC5306</i>       | 11q21         | -5.41  | MS |
| 223334_at    | <i>DKFZp586C1924</i> | 11q14.1       | -5.39  | MS |
| 208700_s_at  | <i>TKT</i>           | 3p14.3        | -5.36  | MS |
| 235124_at    | <i>235124_at</i>     | 15q21.1       | -5.29  | MS |
| 207038_at    | <i>SLC16A6</i>       | 17q24.2       | -5.26  | MS |
| 235133_at    | <i>ZDHHC14</i>       | 6q25.3        | -5.21  | MS |
| 207170_s_at  | <i>LETMD1</i>        | 12q13.12      | -5.21  | MS |
| 212604_at    | <i>MRPS31</i>        | 13q14.11      | -5.20  | MS |
| 231131_at    | <i>RP1-32F7.2</i>    | Xq21.33       | -5.17  | MS |
| 227162_at    | <i>ZBTB26</i>        | 9q33.2        | -5.14  | MS |
| 218400_at    | <i>OAS3</i>          | 12q24.2       | -5.12  | MS |
| 212433_x_at  | <i>RPS2</i>          | 16p13.3       | -5.11  | MS |
| 223595_at    | <i>AD031</i>         | 11q22.1       | -5.10  | MS |
| 204050_s_at  | <i>CLTA</i>          | 9p13          | -5.07  | MS |
| 227418_at    | <i>KIAA1826</i>      | 11q22         | -5.03  | MS |
| 208855_s_at  | <i>STK24</i>         | 13q31.2-q32.3 | -5.03  | MS |
| 230326_s_at  | <i>HSPC138</i>       | 11q14.2       | -5.01  | MS |
| 207831_x_at  | <i>DHPS</i>          | 19p13.2-p13.1 | -4.98  | MS |
| 230047_at    | <i>FLJ32810</i>      | 11q22.1       | -4.97  | MS |
| 209546_s_at  | <i>APOL1</i>         | 22q13.1       | -4.97  | MS |
| 219377_at    | <i>FAM59A</i>        | 18q12.1       | -10.50 | HP |
| 235065_at    | <i>235065_at</i>     | 18q12.1       | -10.35 | HP |
| 230446_at    | <i>230446_at</i>     | 7p21.1        | -9.60  | HP |
| 203186_s_at  | <i>S100A4</i>        | 1q21          | -9.35  | HP |
| 225723_at    | <i>C6orf129</i>      | 6p21.2        | -9.21  | HP |
| 228115_at    | <i>228115_at</i>     | 18q12.1       | -8.92  | HP |
| 218678_at    | <i>NES</i>           | 1q23.1        | -8.91  | HP |
| 226875_at    | <i>DOCK11</i>        | Xq24          | -8.64  | HP |
| 212364_at    | <i>MYO1B</i>         | 2q12-q34      | -8.53  | HP |
| 225400_at    | <i>C1orf19</i>       | 1q25          | -8.50  | HP |
| 222584_at    | <i>MSTO1</i>         | 1q22          | -8.22  | HP |
| 238590_x_at  | <i>MGC10744</i>      | 17p13.1       | -8.21  | HP |
| 201360_at    | <i>CST3</i>          | 20p11.21      | -7.96  | HP |
| 204849_at    | <i>TCFL5</i>         | 20q13.3-qter  | -7.90  | HP |
| 224570_s_at  | <i>IRF2BP2</i>       | 1q42.3        | -7.87  | HP |
| 205903_s_at  | <i>KCNN3</i>         | 1q21.3        | -7.79  | HP |
| 218858_at    | <i>DEPDC6</i>        | 8q24.12       | -7.71  | HP |
| 208770_s_at  | <i>EIF4EBP2</i>      | 10q21-q22     | -7.66  | HP |
| 225033_at    | <i>LOC286167</i>     | 8q24.22       | -7.63  | HP |
| 213061_s_at  | <i>NTAN1</i>         | 16p13.11      | -7.62  | HP |
| 204332_s_at  | <i>AGA</i>           | 4q32-q33      | -7.62  | HP |
| 228523_at    | <i>NANOS1</i>        | 10q26.11      | -7.60  | HP |
| 200916_at    | <i>TAGLN2</i>        | 1q21-q25      | -7.50  | HP |
| 212055_at    | <i>C18orf10</i>      | 18q12.2       | -7.45  | HP |
| 219373_at    | <i>DPM3</i>          | 1q22          | -7.40  | HP |

|             |                   |               |       |      |
|-------------|-------------------|---------------|-------|------|
| 203120_at   | <i>TP53BP2</i>    | 1q42.1        | -7.36 | HP   |
| 57715_at    | <i>FAM26B</i>     | 10pter-q26.12 | -7.32 | HP   |
| 230925_at   | <i>APBB1IP</i>    | 10p12.1       | -7.26 | HP   |
| 209093_s_at | <i>GBA</i>        | 1q21          | -7.26 | HP   |
| 201136_at   | <i>PLP2</i>       | Xp11.23       | -7.18 | HP   |
| 208165_s_at | <i>PRSS16</i>     | 6p21          | -7.18 | HP   |
| 204612_at   | <i>PKIA</i>       | 8q21.11       | -7.12 | HP   |
| 207266_x_at | <i>RBMS1</i>      | 2q24.2        | -7.11 | HP   |
| 222062_at   | <i>IL27RA</i>     | 19p13.11      | -7.08 | HP   |
| 210895_s_at | <i>CD86</i>       | 3q21          | -7.06 | HP   |
| 216640_s_at | <i>PDIA6</i>      | 2p25.1        | -7.04 | HP   |
| 200629_at   | <i>WARS</i>       | 14q32.31      | -7.02 | HP   |
| 225188_at   | <i>RAPH1</i>      | 2q33          | -6.99 | HP   |
| 201666_at   | <i>TIMP1</i>      | Xp11.3-p11.23 | -6.93 | HP   |
| 218523_at   | <i>LHPP</i>       | 10q26.13      | -6.93 | HP   |
| 34210_at    | <i>CD52</i>       | 1p36          | -6.92 | HP   |
| 201897_s_at | <i>CKS1B</i>      | 1q21.2        | -6.92 | HP   |
| 203714_s_at | <i>TBCE</i>       | 1q42.3        | -6.91 | HP   |
| 219032_x_at | <i>OPN3</i>       | 1q43          | -6.91 | HP   |
| 200803_s_at | <i>TEGT</i>       | 12q12-q13     | -6.79 | HP   |
| 212322_at   | <i>SGPL1</i>      | 10q21         | -6.78 | HP   |
| 239066_at   | <i>239066_at</i>  | 8q24.12       | -6.76 | HP   |
| 200934_at   | <i>DEK</i>        | 6p23          | -6.75 | HP   |
| 228415_at   | <i>AP1S2</i>      | Xp22.2        | -6.71 | HP   |
| 218976_at   | <i>DNAJC12</i>    | 10q22.1       | -6.71 | HP   |
| 229084_at   | <i>CNTN4</i>      | 3p26-p25      | -6.60 | CD-1 |
| 203988_s_at | <i>FUT8</i>       | 14q24.3       | -6.47 | CD-1 |
| 226743_at   | <i>FLJ34922</i>   | 17q12         | -5.72 | CD-1 |
| 212463_at   | <i>CD59</i>       | 11p13         | -5.59 | CD-1 |
| 207734_at   | <i>LAX1</i>       | 1q32.1        | -5.54 | CD-1 |
| 230650_at   | <i>230650_at</i>  | 8q13.3        | -5.49 | CD-1 |
| 212699_at   | <i>SCAMP5</i>     | 15q23         | -5.45 | CD-1 |
| 218706_s_at | <i>NS3TP2</i>     | 5q23.2        | -5.37 | CD-1 |
| 203178_at   | <i>GATM</i>       | 15q21.1       | -5.28 | CD-1 |
| 224516_s_at | <i>CXXC5</i>      | 5q31.2        | -5.24 | CD-1 |
| 227067_x_at | <i>NOTCH2NL</i>   | 1q21.2        | -5.20 | CD-1 |
| 208998_at   | <i>UCP2</i>       | 11q13         | -5.12 | CD-1 |
| 217853_at   | <i>TENS1</i>      | 7p13-p12.3    | -5.11 | CD-1 |
| 201189_s_at | <i>ITPR3</i>      | 6p21          | -5.11 | CD-1 |
| 211084_x_at | <i>PRKD3</i>      | 2p21          | -5.03 | CD-1 |
| 220998_s_at | <i>UNC93B1</i>    | 11q13         | -4.98 | CD-1 |
| 212312_at   | <i>BCL2L1</i>     | 20q11.21      | -4.85 | CD-1 |
| 223553_s_at | <i>DOK3</i>       | 5q35.3        | -4.79 | CD-1 |
| 203395_s_at | <i>HES1</i>       | 3q28-q29      | -4.76 | CD-1 |
| 208078_s_at | <i>SNF1LK</i>     | 21q22.3       | -4.76 | CD-1 |
| 214691_x_at | <i>FAM63B</i>     | 15q21.3       | -4.73 | CD-1 |
| 225009_at   | <i>CKLF4</i>      | 16q22.1       | -4.67 | CD-1 |
| 223000_s_at | <i>F11R</i>       | 1q21.2-q21.3  | -4.58 | CD-1 |
| 202826_at   | <i>SPINT1</i>     | 15q15.1       | -4.48 | CD-1 |
| 45288_at    | <i>ABHD6</i>      | 3p14.3        | -4.47 | CD-1 |
| 201998_at   | <i>ST6GAL1</i>    | 3q27-q28      | -4.46 | CD-1 |
| 243699_at   | <i>243699_at</i>  | 2p14          | -4.40 | CD-1 |
| 211574_s_at | <i>MCP</i>        | 1q32          | -4.38 | CD-1 |
| 202545_at   | <i>PRKCD</i>      | 3p21.31       | -4.38 | CD-1 |
| 202369_s_at | <i>TRAM2</i>      | 6p21.1-p12    | -4.35 | CD-1 |
| 224829_at   | <i>CPEB4</i>      | 5q21          | -4.35 | CD-1 |
| 1558819_at  | <i>1558819_at</i> | 8q13.3        | -4.34 | CD-1 |
| 209765_at   | <i>ADAM19</i>     | 5q32-q33      | -4.32 | CD-1 |
| 227123_at   | <i>RAB3B</i>      | 1p32-p31      | -4.30 | CD-1 |

|              |                     |                |       |      |
|--------------|---------------------|----------------|-------|------|
| 218552_at    | <i>ECHDC2</i>       | 1p32.3         | -4.27 | CD-1 |
| 213820_s_at  | <i>STARD5</i>       | 15q26          | -4.27 | CD-1 |
| 207809_s_at  | <i>ATP6AP1</i>      | Xq28           | -4.27 | CD-1 |
| 221530_s_at  | <i>BHLHB3</i>       | 12p11.23-p12.1 | -4.22 | CD-1 |
| 227189_at    | <i>CPNE5</i>        | 6p21.1         | -4.19 | CD-1 |
| 218546_at    | <i>C1orf115</i>     | 1q41           | -4.17 | CD-1 |
| 226873_at    | <i>KIAA1164</i>     | 15q21.3        | -4.16 | CD-1 |
| 211825_s_at  | <i>FLI1</i>         | 11q24.1-q24.3  | -4.14 | CD-1 |
| 221765_at    | <i>UGCG</i>         | 9q31           | -4.14 | CD-1 |
| 213415_at    | <i>CLIC2</i>        | Xq28           | -4.14 | CD-1 |
| 231399_at    | <i>231399_at</i>    | 12q15          | -4.06 | CD-1 |
| 223471_at    | <i>RAB3IP</i>       | 12q14.3        | -4.04 | CD-1 |
| 212666_at    | <i>SMURF1</i>       | 7q21.1-q31.1   | -4.03 | CD-1 |
| 236986_at    | <i>236986_at</i>    | 1q42.2         | -3.98 | CD-1 |
| 203143_s_at  | <i>KIAA0040</i>     | 1q24-25        | -3.96 | CD-1 |
| 229082_at    | <i>KENAE</i>        | 5q13.2         | -3.95 | CD-1 |
| 201563_at    | <i>SORD</i>         | 15q15.3        | -7.30 | CD-2 |
| 200650_s_at  | <i>LDHA</i>         | 11p15.4        | -7.11 | CD-2 |
| 221524_s_at  | <i>RRAGD</i>        | 6q15-q16       | -7.02 | CD-2 |
| 221297_at    | <i>GPRC5D</i>       | 12p13.3        | -6.85 | CD-2 |
| 209398_at    | <i>HIST1H1C</i>     | 6p21.3         | -6.36 | CD-2 |
| 1558508_a_at | <i>C1orf53</i>      | 1q31.3         | -6.28 | CD-2 |
| 209581_at    | <i>HRASLS3</i>      | 11q12.3-q13.1  | -6.25 | CD-2 |
| 202345_s_at  | <i>FABP5</i>        | 8q21.13        | -6.25 | CD-2 |
| 225782_at    | <i>MSRB3</i>        | 12q14.3        | -6.23 | CD-2 |
| 240118_at    | <i>TXNDC11</i>      | 16p13.13       | -5.91 | CD-2 |
| 219648_at    | <i>DSU</i>          | 2q35           | -5.91 | CD-2 |
| 226225_at    | <i>MCC</i>          | 5q21-q22       | -5.82 | CD-2 |
| 227677_at    | <i>JAK3</i>         | 19p13.1        | -5.73 | CD-2 |
| 209627_s_at  | <i>OSBPL3</i>       | 7p15           | -5.71 | CD-2 |
| 235117_at    | <i>LOC494143</i>    | 2p16           | -5.71 | CD-2 |
| 217848_s_at  | <i>PPA1</i>         | 10q11.1-q24    | -5.56 | CD-2 |
| 238718_at    | <i>238718_at</i>    | 11q12.3        | -5.45 | CD-2 |
| 1556194_a_at | <i>1556194_a_at</i> | 4q28.1         | -5.45 | CD-2 |
| 213012_at    | <i>NEDD4</i>        | 15q            | -5.42 | CD-2 |
| 223278_at    | <i>GJB2</i>         | 13q11-q12      | -5.38 | CD-2 |
| 206653_at    | <i>POLR3G</i>       | 5q14.3         | -5.27 | CD-2 |
| 219366_at    | <i>AVEN</i>         | 15q13.1        | -5.19 | CD-2 |
| 204153_s_at  | <i>MFNG</i>         | 22q12          | -5.17 | CD-2 |
| 242181_at    | <i>242181_at</i>    | 11q12          | -5.15 | CD-2 |
| 217755_at    | <i>HN1</i>          | 17q25.1        | -5.12 | CD-2 |
| 206074_s_at  | <i>HMGA1</i>        | 6p21           | -5.07 | CD-2 |
| 226733_at    | <i>PFKFB2</i>       | 1q31           | -5.06 | CD-2 |
| 202934_at    | <i>HK2</i>          | 2p13           | -5.06 | CD-2 |
| 212563_at    | <i>BOP1</i>         | 8q24.3         | -5.03 | CD-2 |
| 205544_s_at  | <i>CR2</i>          | 1q32           | -5.01 | CD-2 |
| 224441_s_at  | <i>USP45</i>        | 6q16.3         | -5.00 | CD-2 |
| 209631_s_at  | <i>GPR37</i>        | 7q31           | -4.94 | CD-2 |
| 201590_x_at  | <i>ANXA2</i>        | 15q21-q22      | -4.91 | CD-2 |
| 218398_at    | <i>MRPS30</i>       | 5q11           | -4.89 | CD-2 |
| 204175_at    | <i>ZNF593</i>       | 1p36.11        | -4.87 | CD-2 |
| 205943_at    | <i>TDO2</i>         | 4q31-q32       | -4.87 | CD-2 |
| 227013_at    | <i>LATS2</i>        | 13q11-q12      | -4.86 | CD-2 |
| 212218_s_at  | <i>FASN</i>         | 17q25          | -4.82 | CD-2 |
| 224975_at    | <i>NFIA</i>         | 1p31.3-p31.2   | -4.79 | CD-2 |
| 219236_at    | <i>PAQR6</i>        | 1q22           | -4.78 | CD-2 |
| 209825_s_at  | <i>UCK2</i>         | 1q23           | -4.78 | CD-2 |
| 225968_at    | <i>PRICKLE2</i>     | 3p14.1         | -4.77 | CD-2 |
| 243492_at    | <i>CTMP</i>         | 1q21           | -4.76 | CD-2 |

|              |                     |               |       |      |
|--------------|---------------------|---------------|-------|------|
| 217809_at    | <i>BZW2</i>         | 7p21.1        | -4.75 | CD-2 |
| 209302_at    | <i>POLR2H</i>       | 3q28          | -4.74 | CD-2 |
| 230766_at    | <i>230766_at</i>    | 21q22.11      | -4.74 | CD-2 |
| 218587_s_at  | <i>MDSRP</i>        | 3q13.33       | -4.73 | CD-2 |
| 208864_s_at  | <i>TXN</i>          | 9q31          | -4.67 | CD-2 |
| 212771_at    | <i>C10orf38</i>     | 10p13         | -4.66 | CD-2 |
| 227599_at    | <i>LOC151963</i>    | 3q28-q29      | -4.62 | CD-2 |
| 208296_x_at  | <i>TNFAIP8</i>      | 5q23.1        | -9.24 | MF   |
| 213093_at    | <i>PRKCA</i>        | 17q22-q23.2   | -8.84 | MF   |
| 227525_at    | <i>GLCCI1</i>       | 7p21.3        | -8.49 | MF   |
| 203097_s_at  | <i>RAPGEF2</i>      | 4q32.1        | -8.16 | MF   |
| 220595_at    | <i>PDZRN4</i>       | 12q12         | -8.16 | MF   |
| 229814_at    | <i>229814_at</i>    | 5q23.1        | -7.77 | MF   |
| 209815_at    | <i>PTCH</i>         | 9q22.3        | -7.28 | MF   |
| 209708_at    | <i>MOXD1</i>        | 6q23.1-23.3   | -7.08 | MF   |
| 207981_s_at  | <i>ESRRG</i>        | 1q41          | -6.93 | MF   |
| 226372_at    | <i>CHST11</i>       | 12q           | -6.82 | MF   |
| 230560_at    | <i>STXBP6</i>       | 14q12         | -6.79 | MF   |
| 1559170_at   | <i>1559170_at</i>   | 18p11.21      | -6.53 | MF   |
| 229233_at    | <i>NRG3</i>         | 10q22-q23     | -6.36 | MF   |
| 218723_s_at  | <i>RGC32</i>        | 13q14.11      | -6.23 | MF   |
| 226358_at    | <i>LOC145842</i>    | 15q22.2       | -6.07 | MF   |
| 222108_at    | <i>AMIGO2</i>       | 12q13.11      | -6.06 | MF   |
| 213261_at    | <i>LBA1</i>         | 3p22.3        | -6.05 | MF   |
| 225382_at    | <i>ZNF275</i>       | Xq28          | -6.03 | MF   |
| 212248_at    | <i>LYRIC</i>        | 8q22.1        | -5.91 | MF   |
| 212345_s_at  | <i>CREB3L2</i>      | 7q34          | -5.88 | MF   |
| 1569237_at   | <i>1569237_at</i>   | 4q32.1        | -5.85 | MF   |
| 230900_at    | <i>KM-HN-1</i>      | 4q35.1        | -5.84 | MF   |
| 238752_at    | <i>MRS2L</i>        | 6p22.3-p22.1  | -5.83 | MF   |
| 210613_s_at  | <i>SYNGR1</i>       | 22q13.1       | -5.82 | MF   |
| 201889_at    | <i>FAM3C</i>        | 7q22.1-q31.1  | -5.76 | MF   |
| 212538_at    | <i>DOCK9</i>        | 13q32.3       | -5.57 | MF   |
| 1569040_s_at | <i>1569040_s_at</i> | 2p11.2        | -5.54 | MF   |
| 226382_at    | <i>LOC283070</i>    | 10p14         | -5.46 | MF   |
| 228497_at    | <i>SLC22A15</i>     | 1p13.1        | -5.45 | MF   |
| 1552504_a_at | <i>BRSK1</i>        | 19q13.4       | -5.26 | MF   |
| 204602_at    | <i>DKK1</i>         | 10q11.2       | -5.26 | MF   |
| 235798_at    | <i>235798_at</i>    | 6p24.2        | -5.25 | MF   |
| 219874_at    | <i>SLC12A8</i>      | 3q21.2        | -5.24 | MF   |
| 229513_at    | <i>STRBP</i>        | 9q33.3        | -5.24 | MF   |
| 223866_at    | <i>ARMC2</i>        | 6q21          | -5.15 | MF   |
| 225732_at    | <i>KLHDC5</i>       | 12p11.22      | -5.13 | MF   |
| 212250_at    | <i>MTDH</i>         | 8q22.1        | -5.13 | MF   |
| 201425_at    | <i>ALDH2</i>        | 12q24.2       | -5.13 | MF   |
| 243179_at    | <i>243179_at</i>    | 6p22.3        | -5.10 | MF   |
| 239344_at    | <i>239344_at</i>    | 16q12.1       | -5.10 | MF   |
| 225997_at    | <i>MOBKL1A</i>      | 4q13.3        | -5.01 | MF   |
| 207405_s_at  | <i>RAD17</i>        | 5q13          | -4.98 | MF   |
| 1559822_s_at | <i>1559822_s_at</i> | 8q22.1        | -4.97 | MF   |
| 235626_at    | <i>CAMK1D</i>       | 10p13         | -4.95 | MF   |
| 216179_x_at  | <i>RNF24</i>        | 20p13-p12.1   | -4.94 | MF   |
| 209298_s_at  | <i>ITSN1</i>        | 21q22.1-q22.2 | -4.92 | MF   |
| 209741_x_at  | <i>ZNF291</i>       | 15q24         | -4.91 | MF   |
| 217820_s_at  | <i>ENAH</i>         | 1q42.12       | -4.89 | MF   |
| 236646_at    | <i>FLJ31166</i>     | 12p13.2       | -4.85 | MF   |
| 1552790_a_at | <i>TLOC1</i>        | 3q26.2        | -4.83 | MF   |
