# Supplementary material
Source: PubMed Central journal article supplement (PMC1895543)
Supplement: blood_blood-2005-11-013458_4.pdf [file blood_blood-2005-11-013458_4.pdf]

|            | <b>Training set<br/>(N=256)</b> | <b>Test set<br/>(N=158)</b> |
|------------|---------------------------------|-----------------------------|
| <b>PR</b>  | 29 (11%)                        | 18 (11%)                    |
| <b>LB</b>  | 31 (12%)                        | 27 (17%)                    |
| <b>MS</b>  | 44 (17%)                        | 24 (15%)                    |
| <b>HY</b>  | 66 (26%)                        | 50 (32%)                    |
| <b>CD1</b> | 22 (9%)                         | 6 (4%)                      |
| <b>CD2</b> | 43 (17%)                        | 17 (11%)                    |
| <b>MF</b>  | 21 (8%)                         | 16 (10%)                    |
