# Supplementary material
Source: PubMed Central journal article supplement (PMC1895543)
Supplement: blood_blood-2005-11-013458_5.pdf [file blood_blood-2005-11-013458_5.pdf]

| <b>Affymetrix Probe Set</b> | <b>Gene Name / Probe Set</b> | <b>Chromosome Map Position</b> | <b>SAM Score( + higher in CD-1)</b> |
|-----------------------------|------------------------------|--------------------------------|-------------------------------------|
| 216438_s_at                 | <i>TMSB4X</i>                | Xq21.3-q22                     | 4.91                                |
| 200849_s_at                 | <i>AHCYL1</i>                | 1p13.2                         | 4.40                                |
| 223851_s_at                 | <i>TNFRSF18</i>              | 1p36.3                         | 4.37                                |
| 239533_at                   | <i>GPR155</i>                | 2q31.1                         | 4.36                                |
| 210401_at                   | <i>P2RX1</i>                 | 17p13.3                        | 4.27                                |
| 220313_at                   | <i>GPR88</i>                 | 1p21.3                         | 4.27                                |
| 206759_at                   | <i>FCER2</i>                 | 19p13.3                        | 4.18                                |
| 204912_at                   | <i>IL10RA</i>                | 11q23                          | 4.11                                |
| 219667_s_at                 | <i>BANK1</i>                 | 4q24                           | 3.99                                |
| 223562_at                   | <i>PARVG</i>                 | 22q13.2-q13                    | 3.95                                |
| 233059_at                   | <i>KCNJ3</i>                 | 2q24.1                         | 3.93                                |
| 209210_s_at                 | <i>PLEKHC1</i>               | 14q22.1                        | 3.85                                |
| 228583_at                   | <i>C14orf46</i>              | 14q24.3                        | 3.80                                |
| 230466_s_at                 | <i>230466_s_at</i>           | chr12                          | 3.79                                |
| 205124_at                   | <i>MEF2B</i>                 | 19p12                          | 3.74                                |
| 219109_at                   | <i>SPAG16</i>                | 2q34                           | 3.73                                |
| 204174_at                   | <i>ALOX5AP</i>               | 13q12                          | 3.73                                |
| 227786_at                   | <i>THRAP6</i>                | 8q24.11                        | 3.70                                |
| 201963_at                   | <i>ACSL1</i>                 | 4q34-q35                       | 3.68                                |
| 214180_at                   | <i>MAN1C1</i>                | 1p35                           | 3.56                                |
| 205773_at                   | <i>CPEB3</i>                 | 10q23.32                       | 3.53                                |
| 225166_at                   | <i>ARHGAP18</i>              | 6q22.33                        | 3.43                                |
| 227167_s_at                 | <i>227167_s_at</i>           | chr12                          | 3.34                                |
| 235518_at                   | <i>SLC8A1</i>                | 2p23-p22                       | 3.29                                |
| 213304_at                   | <i>KIAA0423</i>              | 14q21.3                        | 3.29                                |
| 235473_at                   | <i>235473_at</i>             | chr14                          | 3.25                                |
| 212636_at                   | <i>QKI</i>                   | 6q26-27                        | 3.22                                |
| 218224_at                   | <i>PNMA1</i>                 | 14q24.3                        | 3.21                                |
| 229512_at                   | <i>229512_at</i>             | chr15                          | 3.18                                |
| 213251_at                   | <i>213251_at</i>             | 4q31.21                        | 3.18                                |
| 223228_at                   | <i>LDOC1L</i>                | 22q13.31                       | 3.14                                |
| 1560156_at                  | <i>1560156_at</i>            | chr12                          | 3.11                                |
| 1563209_a_at                | <i>C20orf133</i>             | 20p12.1                        | 3.11                                |
| 231944_at                   | <i>ERO1LB</i>                | 1q42.2-q43                     | 3.08                                |
| 209035_at                   | <i>MDK</i>                   | 11p11.2                        | 3.07                                |
| 213340_s_at                 | <i>KIAA0495</i>              | 1p36.32                        | 3.07                                |
| 213400_s_at                 | <i>TBL1X</i>                 | Xp22.3                         | 3.03                                |
| 226003_at                   | <i>KIF21A</i>                | 12q12                          | 3.02                                |
| 235802_at                   | <i>PLD4</i>                  | 14q32.33                       | 3.02                                |
| 225733_at                   | <i>B3GALT6</i>               | 1p36.33                        | 3.01                                |
| 202561_at                   | <i>TNKS</i>                  | 8p23.1                         | 2.97                                |
| 230154_at                   | <i>WAC</i>                   | chr10                          | 2.97                                |
| 222982_x_at                 | <i>SLC38A2</i>               | 12q                            | 2.95                                |
| 230233_at                   | <i>RASGEF1B</i>              | 4q21.3                         | 2.94                                |
| 226126_at                   | <i>MGC16169</i>              | 4q24                           | 2.93                                |
| 229018_at                   | <i>FLJ22789</i>              | 12q21.31                       | 2.92                                |
| 203302_at                   | <i>DCK</i>                   | 4q13.3-q21.1                   | 2.91                                |
| 1566433_at                  | <i>C14orf175</i>             | 14q32.33                       | 2.88                                |
| 219559_at                   | <i>C20orf59</i>              | 20q13.33                       | 2.86                                |
| 209431_s_at                 | <i>ZNF278</i>                | 22q12.2                        | 2.86                                |
| 228254_at                   | <i>STAM2</i>                 | 2q23.3                         | 2.84                                |
| 240572_s_at                 | <i>LOC374443</i>             | 12p13.31                       | 2.80                                |
| 1557558_s_at                | <i>MATN1</i>                 | 1p35                           | 2.79                                |
| 225053_at                   | <i>CNOT7</i>                 | 8p22-p21.3                     | 2.79                                |
| 227627_at                   | <i>SGK3</i>                  | 8q12.3-8q13.1                  | 2.78                                |
| 221588_x_at                 | <i>ALDH6A1</i>               | 14q24.3                        | 2.77                                |
| 228135_at                   | <i>C1orf52</i>               | 1p22.3                         | 2.72                                |
| 224830_at                   | <i>NUDT21</i>                | 16q12.2                        | 2.70                                |
| 203117_s_at                 | <i>USP52</i>                 | 12q13.2-q13.3                  | 2.68                                |
| 200902_at                   | <i>200902_at</i>             | 1p31                           | 2.67                                |
| 205702_at                   | <i>PHTF1</i>                 | 1p13                           | 2.67                                |

|              |               |                 |       |
|--------------|---------------|-----------------|-------|
| 228328_at    | 228328_at     | chr14           | 2.65  |
| 213410_at    | C10orf137     | 10q26.13        | 2.64  |
| 236235_at    | ITCH          | 20q11.22        | 2.64  |
| 223823_at    | KCNMB2        | 3q26.2-q27.1    | 2.63  |
| 201425_at    | ALDH2         | 12q24.2         | 2.63  |
| 235698_at    | ZFP90         | 16q22.1         | 2.63  |
| 209085_x_at  | RFC1          | 4p14-p13        | 2.61  |
| 215629_s_at  | DLEU2         | 13q14.3         | 2.60  |
| 224886_at    | LOC339123     | 16p13.3         | 2.60  |
| 223569_at    | PPAPDC1B      | 8p12            | 2.58  |
| 223275_at    | HRMT1L6       | 1p13.3          | 2.58  |
| 201969_at    | NASP          | 1p34.1          | 2.56  |
| 229614_at    | ZFPL          | 19q13.41        | 2.56  |
| 221675_s_at  | CHPT1         | 12q             | 2.56  |
| 210792_x_at  | SIVA          | 14q32.33        | 2.54  |
| 242239_at    | NSUN6         | 10p12.31        | 2.54  |
| 204568_at    | KIAA0831      | 14q22.2         | 2.53  |
| 213677_s_at  | PMS1          | 2q31-q33 2q31.1 | 2.53  |
| 214259_s_at  | AKR7A2        | 1p35.1-p36.23   | 2.53  |
| 212930_at    | ATP2B1        | 12q21.3         | 2.52  |
| 221788_at    | PGM3          | 6q14.1-q15      | 2.51  |
| 228630_at    | ZNF84         | 12q24.33        | 2.50  |
| 204224_s_at  | GCH1          | 14q22.1-q22.2   | 2.50  |
| 227095_at    | LEPR          | 1p31            | 2.48  |
| 221478_at    | BNIP3L        | 8p21            | 2.48  |
| 212462_at    | MYST4         | 10q22.2         | 2.46  |
| 209682_at    | CBLB          | 3q13.11         | 2.46  |
| 229145_at    | C10orf104     | 10q22.1         | 2.45  |
| 205296_at    | RBL1          | 20q11.2         | 2.45  |
| 1554155_at   | MCPH1         | 8p23.1          | 2.43  |
| 228603_at    | ACTR3         | 2q14.1          | 2.41  |
| 219920_s_at  | GMPPB         | 3p21.31         | 2.40  |
| 1557433_at   | 1557433_at    |                 | 2.40  |
| 211208_s_at  | CASK          | Xp11.4          | 2.35  |
| 212331_at    | RBL2          | 16q12.2         | 2.35  |
| 218176_at    | MAGEF1        | 3q13            | 2.34  |
| 1559975_at   | BTG1          | 12q22           | 2.33  |
| 221031_s_at  | DKFZP434F0318 | 12p13.2         | 2.33  |
| 216080_s_at  | FADS3         | 11q12-q13.1     | 2.31  |
| 235251_at    | 235251_at     | chr03           | -2.44 |
| 208837_at    | TMED3         | 15q24-q25       | -2.44 |
| 225973_at    | TAP2          | 6p21.3          | -2.51 |
| 241781_at    | C9orf41       | 9q21.13         | -2.56 |
| 211763_s_at  | UBE2B         | 5q23-q31        | -2.58 |
| 209065_at    | UQCRB         | 8q22            | -2.60 |
| 218501_at    | ARHGEF3       | 3p21-p13        | -2.60 |
| 1557915_s_at | GSTO1         | 10q25.1         | -2.61 |
| 205230_at    | RPH3A         | 12q24.13        | -2.61 |
| 202431_s_at  | MYC           | 8q24.12-q24.13  | -2.65 |
| 227492_at    | 227492_at     | chr05           | -2.66 |
| 225863_s_at  | C19orf12      | 19q12           | -2.71 |
| 219532_at    | ELOVL4        | 6q14            | -2.71 |
| 215071_s_at  | HIST1H2AC     | 6p21.3          | -2.72 |
| 1552277_a_at | MGC17337      | 9q31.1          | -2.73 |
| 234725_s_at  | SEMA4B        | 15q25           | -2.74 |
| 212820_at    | DMXL2         | 15q21.2         | -2.76 |
| 207996_s_at  | C18orf1       | 18p11.2         | -2.83 |
| 214290_s_at  | HIST2H2AA     | 1q21.2          | -2.93 |
| 202329_at    | CSK           | 15q23-q25       | -2.95 |
| 222538_s_at  | APPL          | 3p21.1-p14.3    | -3.04 |
| 202604_x_at  | ADAM10        | 15q2 15q22      | -3.08 |
| 223193_x_at  | E2IG5         | 3q21.1          | -3.08 |
| 225634_at    | ZC3HAV1       | 7q34            | -3.10 |

|              |                  |               |       |
|--------------|------------------|---------------|-------|
| 221004_s_at  | <i>ITM2C</i>     | 2q37          | -3.12 |
| 210448_s_at  | <i>P2RX5</i>     | 17p13.3       | -3.17 |
| 1560661_x_at | <i>LOC150759</i> | 2q11.2        | -3.21 |
| 205590_at    | <i>RASGRP1</i>   | 15q15         | -3.26 |
| 1554834_a_at | <i>RASSF5</i>    | 1q32.1        | -3.29 |
| 211043_s_at  | <i>CLTB</i>      | 4q2-q3 5q35   | -3.30 |
| 201051_at    | <i>ANP32A</i>    | 15q22.3-q23   | -3.32 |
| 211676_s_at  | <i>IFNGR1</i>    | 6q23-q24      | -3.33 |
| 235581_at    | <i>235581_at</i> | chr07         | -3.53 |
| 207677_s_at  | <i>NCF4</i>      | 22q13.1       | -3.54 |
| 223704_s_at  | <i>DMRT2</i>     | 9p24.3        | -3.62 |
| 217865_at    | <i>RNF130</i>    | 5q35.3        | -3.65 |
| 238681_at    | <i>GDPD1</i>     | 17q23.2       | -3.65 |
| 206472_s_at  | <i>TLE3</i>      | 15q22         | -3.66 |
| 63825_at     | <i>ABHD2</i>     | 15q26.1       | -3.71 |
| 204779_s_at  | <i>HOXB7</i>     | 17q21.3       | -3.72 |
| 232429_at    | <i>232429_at</i> | chr15         | -3.73 |
| 205352_at    | <i>SERPINI1</i>  | 3q26.1        | -3.77 |
| 208788_at    | <i>ELOVL5</i>    | 6p21.1-p12.1  | -3.77 |
| 202732_at    | <i>PKIG</i>      | 20q12-q13.1   | -3.85 |
| 227099_s_at  | <i>LOC387763</i> | 11p11.2       | -3.93 |
| 213523_at    | <i>CCNE1</i>     | 19q12         | -3.94 |
| 232181_at    | <i>LOC153346</i> | 5q33.1        | -3.94 |
| 213552_at    | <i>GLCE</i>      | 15q23         | -4.00 |
| 208669_s_at  | <i>CRI1</i>      | 15q21.1-q21.2 | -4.06 |
| 217489_s_at  | <i>IL6R</i>      | 1q21          | -4.16 |
| 224851_at    | <i>CDK6</i>      | 7q21-q22      | -4.34 |
| 221973_at    | <i>221973_at</i> | chr02         | -4.41 |
| 224948_at    | <i>MRPS24</i>    | 7p14          | -4.45 |
| 217196_s_at  | <i>CAMSAP1L1</i> | 1q32.1        | -4.73 |
| 226961_at    | <i>LOC222171</i> | 7p15.1        | -4.80 |
| 212386_at    | <i>TCF4</i>      | 18q21.1       | -5.12 |
| 205159_at    | <i>CSF2RB</i>    | 22q13.1       | -5.47 |
| 213578_at    | <i>BMPR1A</i>    | 10q22.3       | -6.08 |
