# Supplementary material
Source: PubMed Central journal article supplement (PMC1895543)
Supplement: blood_blood-2005-11-013458_6.pdf [file blood_blood-2005-11-013458_6.pdf]

| <b>Affymetrix Probe Set</b> | <b>Gene Name / Probe Set</b> | <b>Chromosome Map Position</b> | <b>SAM Score( + higher in CD-1)</b> |
|-----------------------------|------------------------------|--------------------------------|-------------------------------------|
| 207076_s_at                 | ASS                          | 9q34.1                         | 7.67                                |
| 210587_at                   | INHBE                        | 12q13.3                        | 7.15                                |
| 220993_s_at                 | GPR63                        | 6q16.1-q16.3                   | 6.96                                |
| 212233_at                   | MAP1B                        | 5q13                           | 6.39                                |
| 200629_at                   | WARS                         | 14q32.31                       | 6.29                                |
| 221539_at                   | EIF4EBP1                     | 8p12                           | 5.99                                |
| 229309_at                   | ADRB1                        | 10q24-q26                      | 5.89                                |
| 229281_at                   | 229281_at                    | chr14                          | 5.78                                |
| 228365_at                   | CPNE8                        | 12q12                          | 5.71                                |
| 204411_at                   | KIF21B                       | 1pter-q31.3                    | 5.69                                |
| 1553027_a_at                | KLHL4                        | Xq21.3                         | 5.66                                |
| 203476_at                   | TPBG                         | 6q14-q15                       | 5.62                                |
| 209921_at                   | SLC7A11                      | 4q28-q32                       | 5.42                                |
| 202847_at                   | PCK2                         | 14q11.2                        | 5.35                                |
| 222116_s_at                 | TBC1D16                      | 17q25.3                        | 5.33                                |
| 203397_s_at                 | GALNT3                       | 2q24-q31                       | 5.23                                |
| 213524_s_at                 | G0S2                         | 1q32.2-q41                     | 5.15                                |
| 206039_at                   | RAB33A                       | Xq25                           | 5.08                                |
| 213475_s_at                 | ITGAL                        | 16p11.2                        | 4.97                                |
| 201397_at                   | PHGDH                        | 1p12                           | 4.87                                |
| 203892_at                   | WFDC2                        | 20q12-q13.2                    | 4.86                                |
| 223195_s_at                 | SESN2                        | 1p35.3                         | 4.83                                |
| 204114_at                   | NID2                         | 14q21-q22                      | 4.81                                |
| 227353_at                   | 227353_at                    | chr17                          | 4.77                                |
| 217763_s_at                 | RAB31                        | 18p11.3                        | 4.73                                |
| 203423_at                   | RBP1                         | 3q23                           | 4.65                                |
| 227117_at                   | XPOT                         | 12q14.2                        | 4.61                                |
| 212501_at                   | CEBPB                        | 20q13.1                        | 4.60                                |
| 205047_s_at                 | ASNS                         | 7q21.3                         | 4.59                                |
| 219463_at                   | C20orf103                    | 20p12                          | 4.59                                |
| 224928_at                   | SET7                         | 4q28                           | 4.56                                |
| 231202_at                   | ALDH1L2                      | 12q23.3                        | 4.54                                |
| 218976_at                   | DNAJC12                      | 10q22.1                        | 4.52                                |
| 227443_at                   | C9orf150                     | 9p23                           | 4.41                                |
| 224917_at                   | MIRN21                       | chr09                          | 4.36                                |
| 221841_s_at                 | KLF4                         | 9q31                           | 4.36                                |
| 224564_s_at                 | RTN3                         | 11q13                          | 4.32                                |
| 217967_s_at                 | C1orf24                      | 1q25                           | 4.31                                |
| 227915_at                   | ASB2                         | 14q31-q32                      | 4.30                                |
| 218145_at                   | TRIB3                        | 20p13-p12.2                    | 4.28                                |
| 215930_s_at                 | CTAGE5                       | 14q13.3                        | 4.26                                |
| 201761_at                   | MTHFD2                       | 2p13.1                         | 4.23                                |
| 219892_at                   | TM6SF1                       | 15q24-q26                      | 4.16                                |
| 213888_s_at                 | TRAF3IP3                     | 1q32.3-q41                     | 4.10                                |
| 204999_s_at                 | ATF5                         | 19q13.3                        | 4.10                                |
| 227361_at                   | 227361_at                    | chr17                          | 4.08                                |
| 1568619_s_at                | LOC162073                    | 16p12.3                        | 4.07                                |
| 224839_s_at                 | GPT2                         | 16q12.1                        | 4.01                                |
| 201061_s_at                 | STOM                         | 9q34.1                         | 3.94                                |
| 203760_s_at                 | SLA                          | 8q22.3-<br>qter 8q24           | 3.93                                |
| 239045_at                   | ERN1                         | 17q24.2                        | 3.87                                |
| 209822_s_at                 | VLDLR                        | 9p24                           | 3.86                                |
| 220448_at                   | KCNK12                       | 2p22-p21                       | 3.86                                |
| 238914_at                   | 238914_at                    | chr18                          | 3.83                                |
| 230172_at                   | FAM14B                       | 14q32.13                       | 3.83                                |
| 203438_at                   | STC2                         | 5q35.1                         | 3.83                                |
| 204203_at                   | CEBPG                        | 19q13.11                       | 3.82                                |
| 201036_s_at                 | HADHSC                       | 4q22-q26                       | 3.77                                |
| 225975_at                   | PCDH18                       | 4q31                           | 3.75                                |
| 231790_at                   | DMGDH                        | 5q14.1                         | 3.73                                |
| 230741_at                   | 230741_at                    | chr12                          | 3.68                                |

|             |              |                |       |
|-------------|--------------|----------------|-------|
| 224916_at   | LOC340061    | 5q31.2         | 3.67  |
| 239675_at   | LOC283143    | 11q23.3        | 3.62  |
| 218694_at   | ARMCX1       | Xq21.33-q22.2  | 3.61  |
| 232054_at   | PCDH20       | 13q21          | 3.53  |
| 209083_at   | CORO1A       | 16p11.2        | 3.48  |
| 201195_s_at | SLC7A5       | 16q24.3        | 3.37  |
| 226505_x_at | USP32        | 17q23.2        | 3.32  |
| 227823_at   | RGAG4        | Xq13.1         | 3.26  |
| 201343_at   | UBE2D2       | 5q31.2         | -3.17 |
| 204681_s_at | RAPGEF5      | 7p15.3         | -3.18 |
| 214172_x_at | RYK          | 3q22           | -3.25 |
| 207655_s_at | BLNK         | 10q23.2-q23.33 | -3.30 |
| 227840_at   | LOC130355    | 2q14.2         | -3.32 |
| 1557257_at  | BCL10        | 1p22           | -3.33 |
| 243780_at   | 243780_at    | 22q13.2        | -3.34 |
| 202606_s_at | TLK1         | 2q31.1         | -3.39 |
| 228574_at   | DKFZp762A217 | 12q21.31       | -3.41 |
| 226743_at   | FLJ34922     | 17q12          | -3.41 |
| 47105_at    | DUS2L        | 16q22.1        | -3.41 |
| 227767_at   | CSNK1G3      | 5q23           | -3.44 |
| 229147_at   | RASSF6       | 4q13.3         | -3.46 |
| 230560_at   | STXBP6       | 14q12          | -3.50 |
| 236065_at   | 236065_at    | 12q12          | -3.59 |
| 207957_s_at | PRKCB1       | 16p11.2        | -3.68 |
| 228551_at   | MGC24039     | 12p11.21       | -3.69 |
| 220147_s_at | FAM60A       | 12p11          | -3.71 |
| 212807_s_at | SORT1        | 1p21.3-p13.1   | -3.71 |
| 209764_at   | MGAT3        | 22q13.1        | -3.78 |
| 226169_at   | SBF2         | 11p15.4        | -3.79 |
| 228377_at   | KLHL14       | 18q12.1        | -3.88 |
| 219497_s_at | BCL11A       | 2p16.1         | -4.02 |
| 35820_at    | GM2A         | 5q31.3-q33.1   | -4.06 |
| 210150_s_at | LAMA5        | 20q13.2-q13.3  | -4.12 |
| 212739_s_at | NME4         | 16p13.3        | -4.13 |
| 214039_s_at | LAPTM4B      | 8q22.1         | -4.15 |
| 220059_at   | BRDG1        | 4q13.2         | -4.39 |
| 235764_at   | 235764_at    | chr04          | -4.50 |
| 211423_s_at | SC5DL        | 11q23.3        | -4.51 |
| 221676_s_at | CORO1C       | 12q24.1        | -4.54 |
| 213093_at   | PRKCA        | 17q22-q23.2    | -4.61 |
| 218330_s_at | NAV2         | 11p15.1        | -4.66 |
| 1555510_at  | ZNF215       | 11p15.4        | -4.73 |
| 208943_s_at | TLOC1        | 3q26.2         | -4.78 |
| 212350_at   | TBC1D1       | 4p14           | -4.89 |
| 205901_at   | PNOC         | 8p21           | -4.93 |
| 203501_at   | PGCP         | 8q22.2         | -4.97 |
| 204208_at   | RNGTT        | 6q16           | -5.07 |
| 223158_s_at | NEK6         | 9q33.3-q34.11  | -5.11 |
| 226459_at   | PIK3AP1      | 10q24.1        | -5.23 |
| 223423_at   | GPR160       | 3q26.2-q27     | -5.42 |
| 217853_at   | TENS1        | 7p13-p12.3     | -5.53 |
| 218723_s_at | RGC32        | 13q14.11       | -5.63 |
| 229459_at   | FAM19A5      | 22q13.32       | -5.72 |
| 201998_at   | ST6GAL1      | 3q27-q28       | -5.78 |
| 209201_x_at | CXCR4        | 2q21           | -6.12 |
| 205789_at   | CD1D         | 1q22-q23       | -6.32 |
| 227123_at   | RAB3B        | 1p32-p31       | -6.50 |
| 219073_s_at | OSBPL10      | 3p22.3         | -6.54 |
| 210715_s_at | SPINT2       | 19q13.1        | -6.74 |
| 201313_at   | ENO2         | 12p13          | -6.77 |
| 212226_s_at | PPAP2B       | 1pter-p22.1    | -6.96 |
| 206150_at   | TNFRSF7      | 12p13          | -7.42 |
